# Supplementary material for: A PCBM-Modified TiO2 Blocking Layer towards Efficient Perovskite Solar Cells
Source: Hindawi journal article supplement (doi:10.1155/2017/2562968), 2017-01-01
Supplement: f1 [file 2562968.f1.docx]

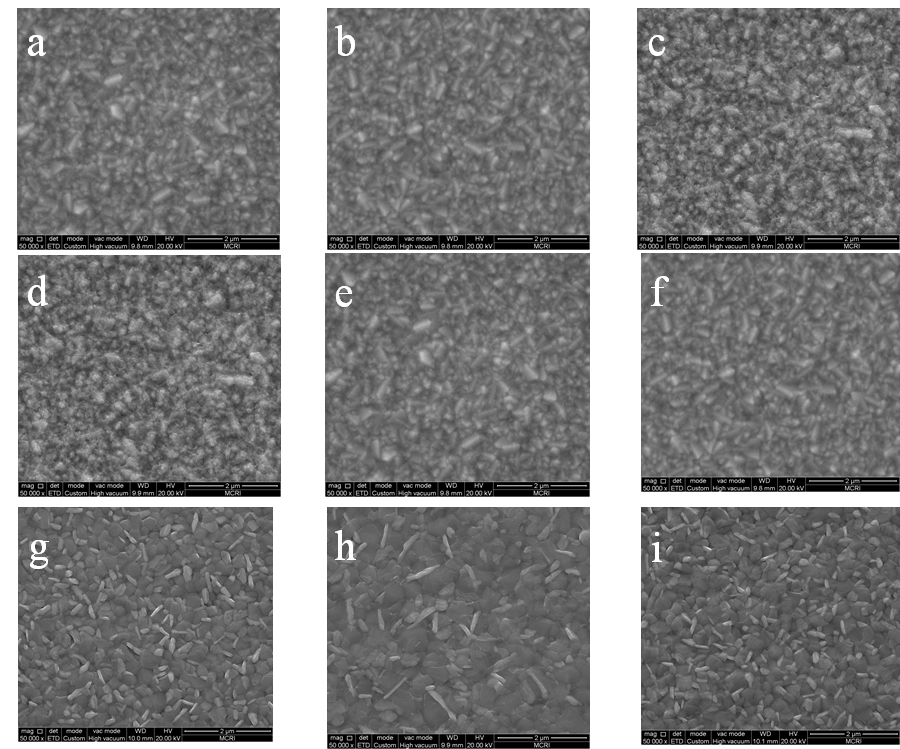


Fig. S1 SEM photographs of TiO2 thin films prepared at (a) 2000 r.p.m, (b) 4000 r.p.m and (c) 6000 r.p.m, respectively. SEM photographs of TiO2/PCBM thin films with TiO2 prepared at 4000 r.p.m and PCBM prepared at (d) 2000 r.p.m, (e) 4000 r.p.m and (f) 6000 r.p.m, respectively. And SEM photographs of CH3NH3PbI3-xClx on TiO2/PCBM thin films, the PCBM spin-coating speed is (g) 2000 r.p.m, (h) 4000 r.p.m and (i) 6000 r.p.m.
