# Supplementary material for: A PCBM-Modified TiO2 Blocking Layer towards Efficient Perovskite Solar Cells
Source: Hindawi journal article supplement (doi:10.1155/2017/2562968), 2017-01-01
Supplement: f3 [file 2562968.f3.docx]

Fig. S3 XRD spectra TiO2/PCBM thin films with TiO2 prepared at 4000 r.p.m and PCBM prepared at (a) 2000 r.p.m, (b) 4000 r.p.m and (c) 6000 r.p.m, respectively.
