# Supplementary figures and images for: A PCBM-Modified TiO2 Blocking Layer towards Efficient Perovskite Solar Cells
Source: Hindawi journal article supplement (doi:10.1155/2017/2562968), 2017-01-01

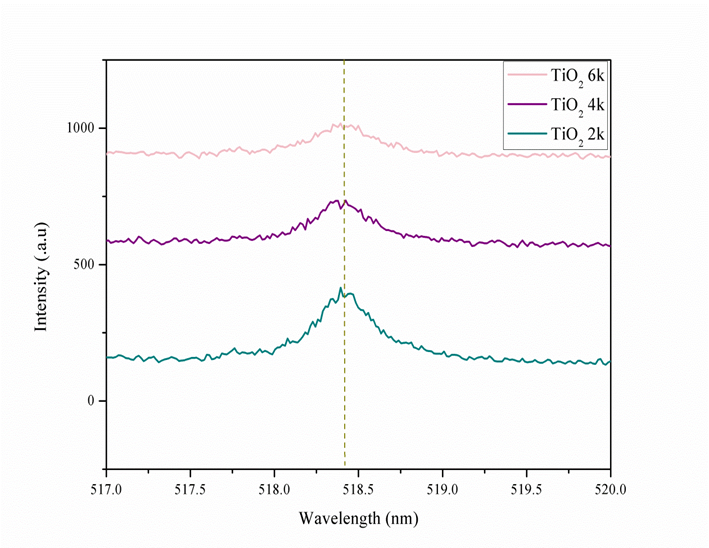


Fig. S4 PL spectra of TiO2 thin film prepared at 2000, 4000 and 6000 r.p.m spin-coating speed respectively.

Supplement: f4 [file 2562968.f4.docx]
